# Supplementary material for: At the polymer electrolyte interfaces: the role of the polymer host in interphase layer formation in Li-batteries
Source: Royal Society of Chemistry journal article supplement (doi:10.1039/c5ta02485d), 2015-01-01
Supplement: c5ta02485d1.pdf [file c5ta02485d1.pdf]

## Electronic Supplementary Information for

# At the polymer electrolyte interfaces: the role of the polymer host for interphase layer formation in Li-batteries

Bing Sun, Chao Xu, Jonas Mindemark, Torbjörn Gustafsson, Kristina Edström, Daniel Brandell\*

*Department of Chemistry – Ångström Laboratory, Box 538, SE-75121, Uppsala University*

\*Daniel.Brandell@kemi.uu.se

### Supplementary Figures and Tables

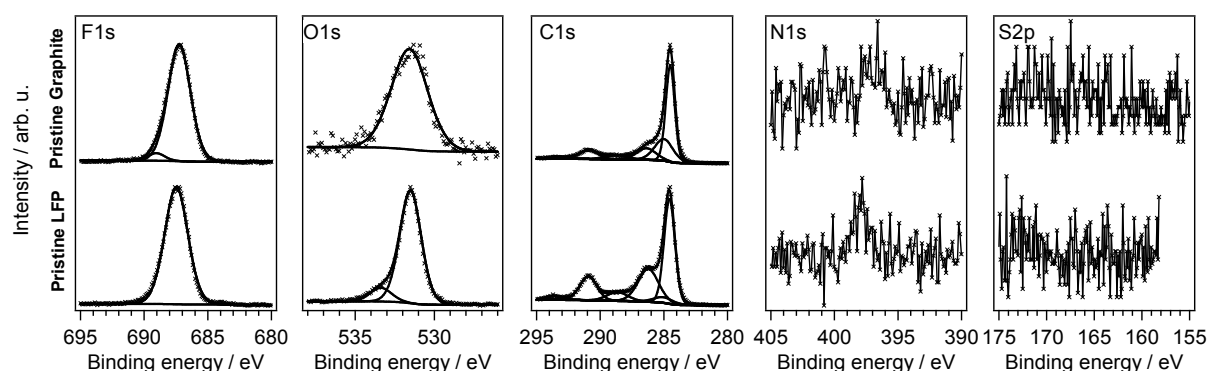

Figure S1. XPS spectra showing elemental fittings from pristine electrodes and pristine SPE.

Table S1. Relative concentrations of F, O, N, C, S and Li in the LiFePO<sub>4</sub> and graphite half cells using different SPEs.

| Cell specification                                                 |                           | F    | O    | N   | C    | S   | Li  |
|--------------------------------------------------------------------|---------------------------|------|------|-----|------|-----|-----|
| PTMC-based LFP cells (1 <sup>st</sup> cycle and long-term cycling) | Pristine PTMC             | 16.0 | 53.6 | 0.5 | 18.8 | 3.2 | 7.9 |
|                                                                    | LFP                       | 46.2 | 15.4 | 0.3 | 36.2 | 0.8 | 1.0 |
|                                                                    | PTMC(LFP)                 |      |      |     |      |     |     |
|                                                                    | LFP (long-term)           | 13.5 | 50.1 | 0.7 | 29.4 | 2.3 | 2.8 |
|                                                                    | PTMC(LFP) (long-term)     | 11.1 | 53.5 | 0.5 | 31.7 | 2.6 | 0.4 |
| PEO-based LFP cell (1 <sup>st</sup> cycle)                         | Pristine PEO <sup>2</sup> | 12.9 | 30.4 | 1.6 | 47.7 | 3.3 | 4.0 |
|                                                                    | LFP                       | 39.0 | 20.3 | 1.2 | 36.1 | 1.7 | 1.7 |
|                                                                    | PEO(LFP)                  | 38.9 | 30.8 | 1.6 | 25.8 | 2.5 | 0.4 |

|                                                        |                    |      |      |     |      |     |     |
|--------------------------------------------------------|--------------------|------|------|-----|------|-----|-----|
| PTMC-based<br>graphite cell<br>(1 <sup>st</sup> cycle) | Graphite           | 15.9 | 41.2 | 0.0 | 41.4 | 0.3 | 1.3 |
|                                                        | PTMC(Graphite<br>) | 16.1 | 44.6 | 0.0 | 38.2 | 0.0 | 1.1 |
